# Supplementary material for: Access to enhanced catalytic core–shell CuO–Pd nanoparticles for the organic transformations
Source: Royal Society of Chemistry journal article supplement (doi:10.1039/c6ra03883b), 2016-01-01

## Supporting Information

### Access to enhanced catalytic core-shell CuO-Pd nanoparticles for the organic transformations

Kanchan Mishra, Nagaraj Basavegowda, and Yong Rok Lee\*

School of Chemical Engineering, Yeungnam University, Gyeongsan 712-749, Republic of Korea

\*Fax: 82-53-810-4631; Tel: 82-53-810-2529; E-mail: yrlee@yu.ac.kr

| Table of contents                                                                             | Page    |
|-----------------------------------------------------------------------------------------------|---------|
| 1. Experimental section                                                                       | S2      |
| 2. Characterization of nanoparticles                                                          |         |
| a. XPS spectra                                                                                | S2      |
| b. HRTEM images                                                                               | S2      |
| c. EDS peaks                                                                                  | S3      |
| d. FTIR spectra                                                                               | S3      |
| e. Phytochemical constituents of <i>C. rotundus</i> extract                                   | S4      |
| f. UV-Vis spectra                                                                             | S4      |
| g. DSC-TGA                                                                                    | S5      |
| h. Zeta potential                                                                             | S5      |
| i. AFM images                                                                                 | S6-S7   |
| j. XRD patterns after 5 <sup>th</sup> cycle                                                   | S8      |
| 3. Characterization of spectral data ( <b>4a-4e</b> ), ( <b>6a-6e</b> ), and ( <b>9a-9e</b> ) | S8-S10  |
| 4. Copies of NMR spectra of compounds ( <b>9a-9e</b> )                                        | S11-S15 |

## 1. Experimental section

### *Synthesis of CuO and Pd nanoparticles*

A volume of 50 mL of the *C. rotundus* rhizome extract solution was added to 100 mL of an aqueous solution of 1.0 mmol Cu(OAc)<sub>2</sub>. The mixture solution was then sonicated at 60 °C for 2 h. After 2 h, the color of the final solution changed to black, which indicated the formation of CuO nanoparticles. The synthesized nanoparticles were isolated by centrifugation and purified.

A volume of 50 mL of the *C. rotundus* rhizome extract solution was added to 100 mL of an aqueous solution of 1.0 mmol PdCl<sub>2</sub>. The mixture solution was then sonicated at 60 °C for 2 h. After 2 h, the color of the final solution changed to dark brown, which indicated the formation of Pd nanoparticles. The synthesized nanoparticles were isolated by centrifugation and purified.

## 2. Characterization of nanoparticles

### a. XPS spectra

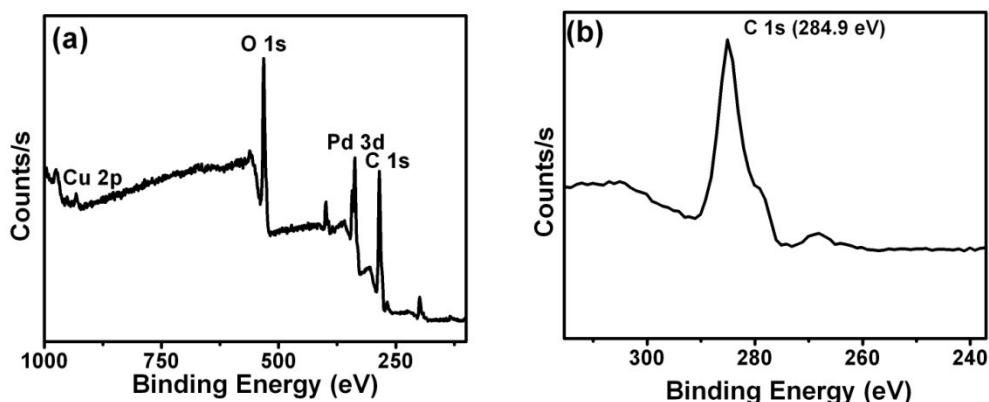

Fig. S1. (a) XPS full scan survey of CuO-Pd NPs, and (b) C 1s XPS spectra of CuO-Pd NPs.

### b. HRTEM images of CuO-Pd NPs

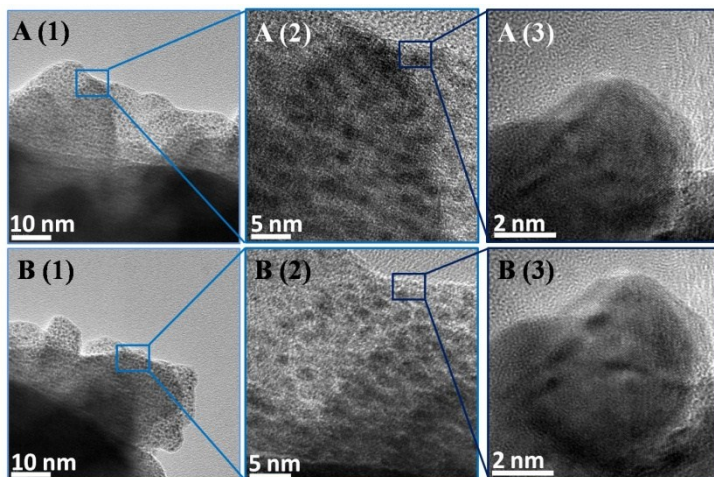

Fig. S2. HR-TEM images of CuO-Pd NPs at two different locations.

### c. EDS peaks of CuO-Pd NPs

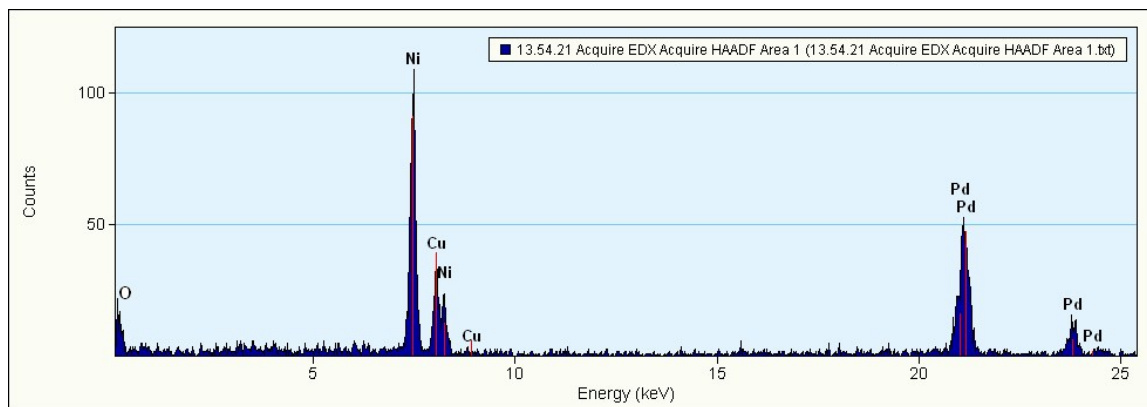

Fig. S3. EDS peaks of CuO-Pd NPs.

### d. FTIR Spectra

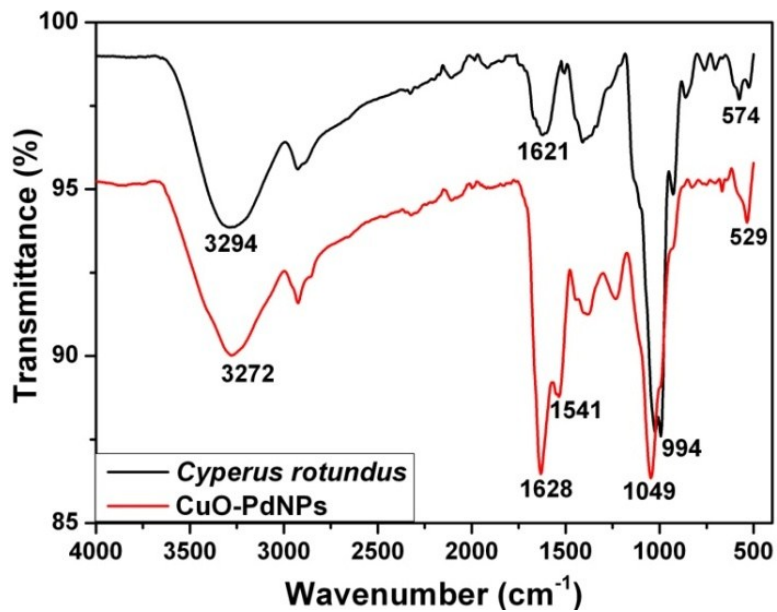

Fig. S4. FTIR spectra of CuO-Pd NPs and *Cyperus rotundus* rhizome extract.

e. Phytochemical constituents of *C. rotundus* extract.

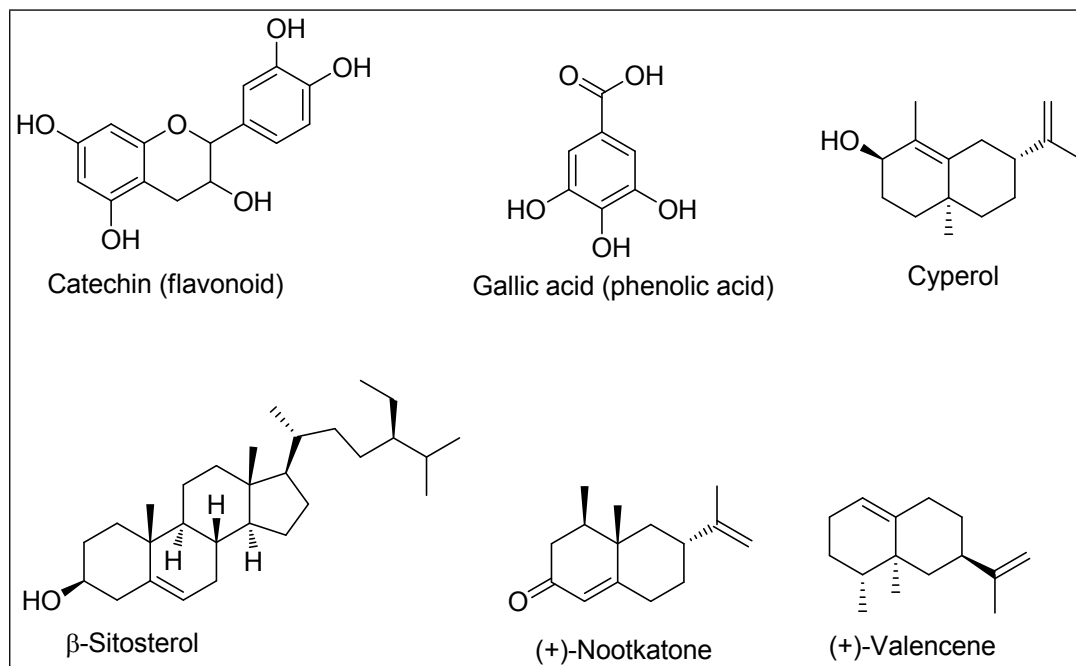

Fig. S5. Phytochemical constituents of *C. rotundus* extract.

f. UV-Vis spectra

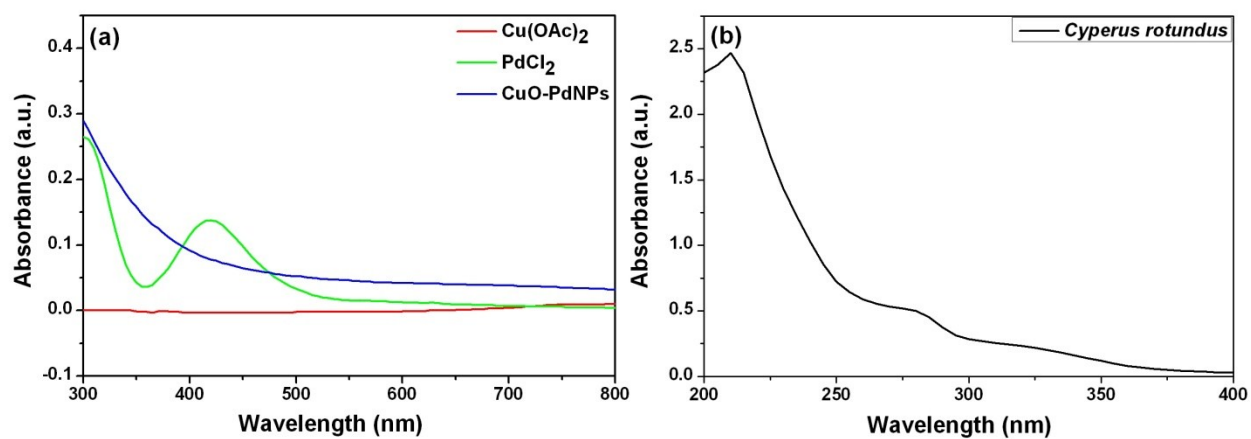

Fig. S6. UV-Vis spectra of (a)  $\text{Cu}(\text{OAc})_2$ ,  $\text{PdCl}_2$ , and  $\text{CuO-Pd NPs}$  and (b) *Cyperus rotundus*.

**g. DSC-TGA spectra**

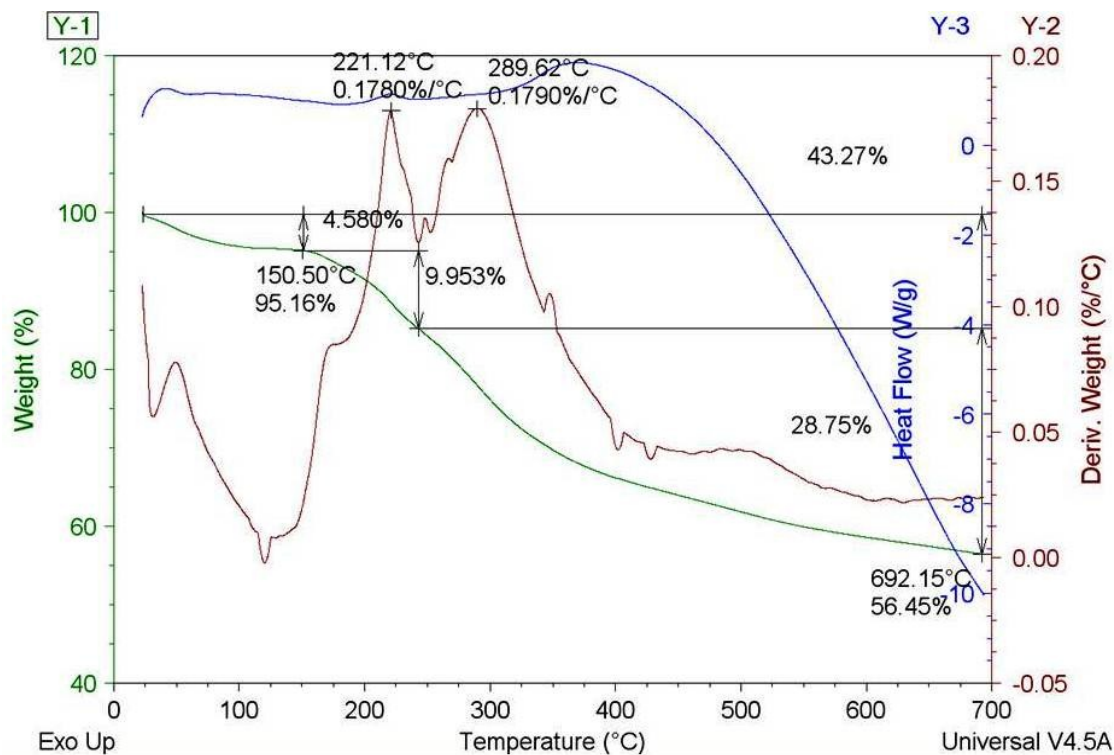

Fig. S7. DSC-TGA spectra of CuO-Pd NPs

**h. Zeta potential distribution**

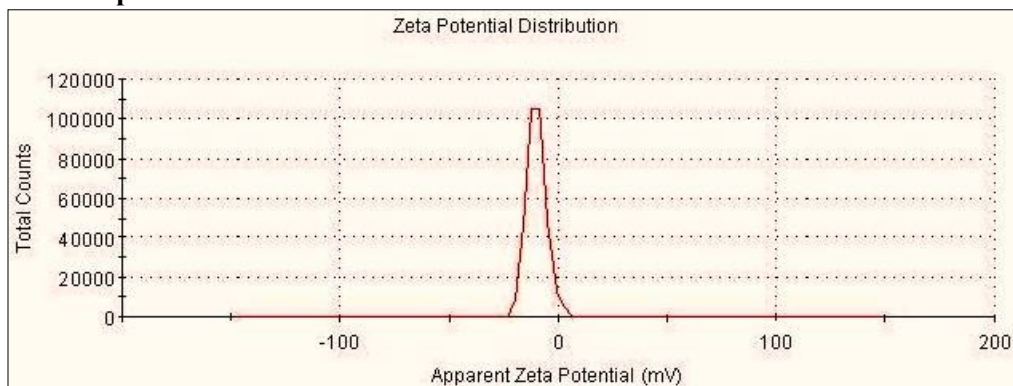

Fig. S8: Zeta potential (ZP) distribution of CuO-Pd NPs.

Table S1: Average zeta potential calculation of CuO-Pd NPs

| CuO-Pd NPs | T (°C)         | ZP (mV) | Z-dev. (mV) |
|------------|----------------|---------|-------------|
| 1          | 25             | -9.8    | 4.40        |
| 2          | 25             | -10.2   | 6.11        |
| 3          | 25             | -9.82   | 5.52        |
|            | <b>Avg.</b>    | -9.94   | 5.34        |
|            | <b>Std Dev</b> | 0.225   | 0.869       |

**i. AFM images**

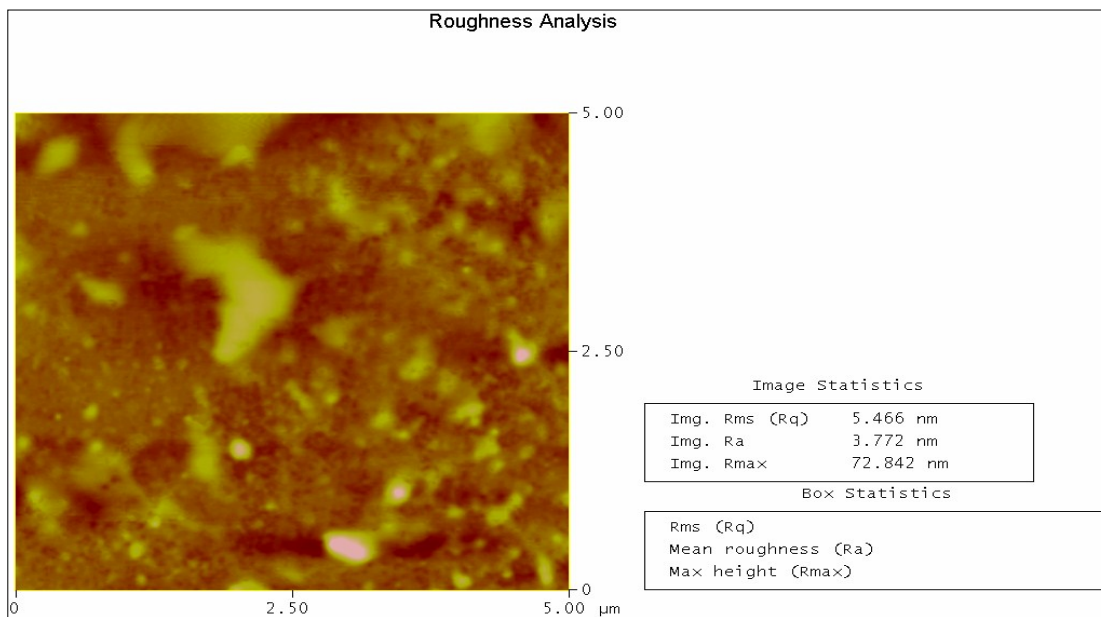

**Fig. S9:** Roughness analysis of CuO-Pd NPs at 5  $\mu\text{m}^2$ .

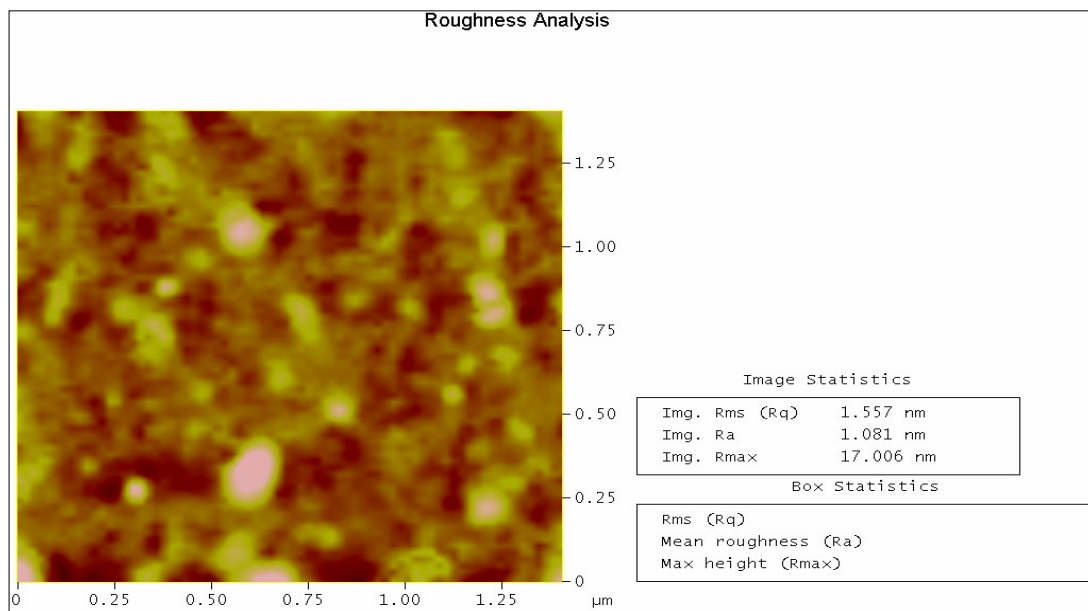

**Fig. S10:** Roughness analysis of CuO-Pd NPs at 1.3  $\mu\text{m}^2$ .



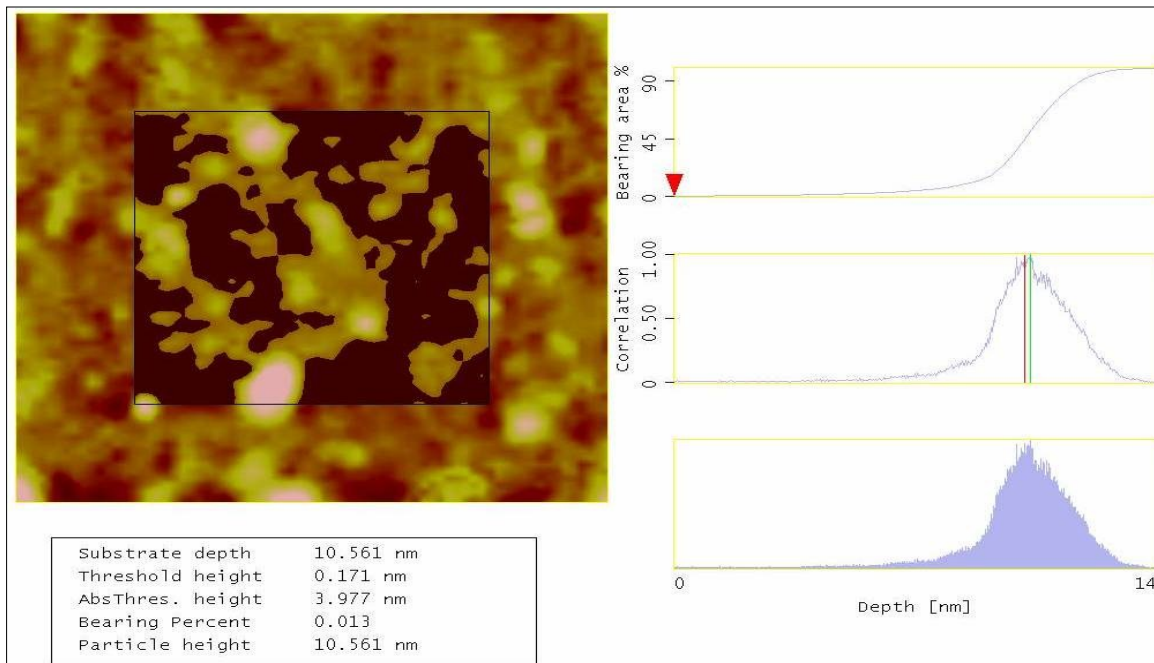

Fig. S11: Particle height of CuO-Pd NPs.

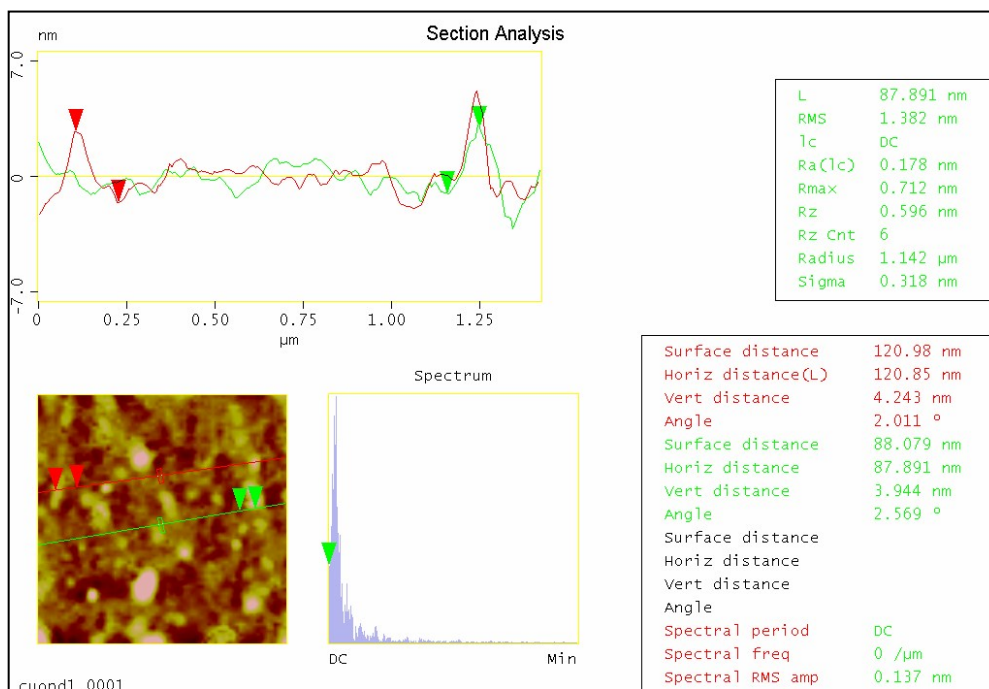

Fig. S12: Section analysis of CuO-Pd NPs.

j. XRD patterns after 5<sup>th</sup> cycle

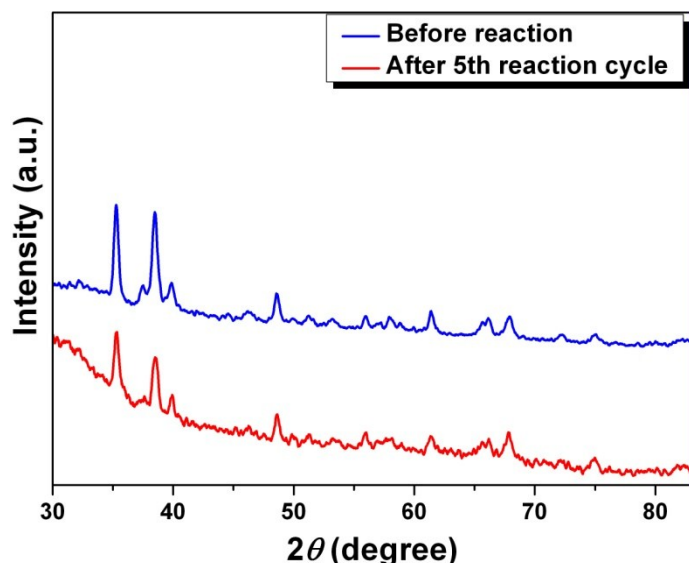

Fig. S13: XRD patterns of CuO-Pd NPs before and after recycling for five times.

3. Characterization spectral data (4a-4e)<sup>1</sup>, (6a-6e)<sup>1</sup>, and (9a-9e)

**2,3-Diphenyl-2,3-dihydroquinazolin-4(1H)-one (4a).** Yield: 97%; yellow solid; mp 205-206 °C; <sup>1</sup>H NMR (300 MHz, DMSO-*d*<sub>6</sub>) δ 7.77 (1H, d, *J*=7.8 Hz), 7.64 (1H, s), 7.42-7.18 (11H, m), 6.79 (1H, d, *J*=8.1 Hz), 6.74 (1H, t, *J*=7.2 Hz), 6.30 (1H, s); <sup>13</sup>C NMR (75 MHz, DMSO-*d*<sub>6</sub>) δ 162.2, 146.5, 140.7, 140.6, 133.7, 128.5, 128.3, 128.2, 127.9, 126.5, 126.2, 125.9, 117.4, 115.3, 114.7, 72.6; IR (KBr) 3427, 3294, 3061, 2832, 1633, 1511, 1392, 1332, 1257, 1158, 1025, 754 cm<sup>-1</sup>; HRMS *m/z* (M<sup>+</sup>) calcd for C<sub>20</sub>H<sub>16</sub>N<sub>2</sub>O: 300.1263. Found: 300.1265.

**2-(4-Methoxyphenyl)-3-m-tolyl-2,3-dihydroquinazolin-4(1H)-one (4b).** Yield: 92%; yellow solid; mp 209-210 °C; <sup>1</sup>H NMR (300 MHz, DMSO-*d*<sub>6</sub>) δ 7.75 (1H, d, *J*=7.5 Hz), 7.54 (1H, s), 7.33-7.19 (5H, m), 7.14 (1H, s), 7.03 (2H, t, *J*=8.7 Hz), 6.88-6.85 (2H, m), 6.77 (1H, t, *J*=8.1 Hz), 6.22 (1H, s), 3.71 (3H, s), 2.27 (3H, s); <sup>13</sup>C NMR (75 MHz, DMSO-*d*<sub>6</sub>) δ 162.2, 159.0, 146.5, 140.8, 137.8, 133.6, 132.7, 128.3, 127.9, 127.8, 126.8, 126.6, 123.2, 117.4, 115.4, 114.7, 113.6, 72.3, 55.0, 20.8; IR (KBr) 3424, 3301, 2961, 2833, 1634, 1507, 1393, 1301, 1248, 1170, 1026, 830, 766 cm<sup>-1</sup>; HRMS *m/z* (M<sup>+</sup>) calcd for C<sub>22</sub>H<sub>20</sub>N<sub>2</sub>O<sub>2</sub>: 344.1525. Found: 344.1525.

**3-(4-Isopropylphenyl)-2-(4-methoxyphenyl)-2,3-dihydroquinazolin-4(1H)-one (4c).** Yield: 95%; yellow solid; mp 171-172 °C; <sup>1</sup>H NMR (300 MHz, DMSO-*d*<sub>6</sub>) δ 7.75 (1H, d, *J*=7.5 Hz), 7.55 (1H, s), 7.32-7.21 (7H, m), 6.86 (2H, d, *J*=8.4 Hz), 6.74 (2H, t, *J*=8.4 Hz), 6.19 (1H, s), 3.70 (3H, s), 2.91-2.82 (1H, m), 1.19 (6H, d, *J*=6.9 Hz); <sup>13</sup>C NMR (75 MHz, DMSO-*d*<sub>6</sub>) δ 162.1, 159.05, 146.4, 145.9, 138.6, 133.5, 132.8, 127.8, 127.6, 126.3, 125.9, 117.3, 115.4, 114.7, 113.6, 72.2, 54.9, 32.9, 23.7; IR (KBr) 3420, 3298, 2956, 1630, 1508, 1392, 1332, 1249, 1177, 1027, 833, 700 cm<sup>-1</sup>; HRMS *m/z* (M<sup>+</sup>) calcd for C<sub>24</sub>H<sub>24</sub>N<sub>2</sub>O<sub>2</sub>: 372.1838. Found: 372.1840.

**3-(4-Fluorophenyl)-2-(4-methoxyphenyl)-2,3-dihydroquinazolin-4(1H)-one (4d).** Yield: 94%; yellow solid; mp 259-260 °C; <sup>1</sup>H NMR (300 MHz, DMSO-*d*<sub>6</sub>) δ 7.74 (1H, d, *J*=7.8 Hz), 7.49 (1H, s), 7.29-7.12 (7H, m), 6.86 (2H, d, *J*=8.7 Hz), 6.76 (2H, t, *J*=7.8 Hz), 6.23 (1H, s), 3.70 (3H, s); <sup>13</sup>C NMR (75 MHz, DMSO-*d*<sub>6</sub>) δ 162.5, 159.2, 146.8, 133.7, 132.2, 128.8, 128.7, 128.09, 127.9, 117.4, 115.4, 115.1, 115.0, 114.6, 113.6, 72.6, 55.0; IR (KBr) 3427, 3302, 1643, 1504, 1390, 1305, 1245, 1026, 994, 832, 760 cm<sup>-1</sup>; HRMS *m/z* (M<sup>+</sup>) calcd for C<sub>21</sub>H<sub>17</sub>FN<sub>2</sub>O<sub>2</sub>: 348.1274. Found: 348.1272.

**2,3-Bis(4-methoxyphenyl)-2,3-dihydroquinazolin-4(1H)-one (4e).** Yield: 96%; yellow solid; mp 227-228 °C; <sup>1</sup>H NMR (300 MHz, DMSO-*d*<sub>6</sub>) δ 7.74 (1H, d, *J*=7.8 Hz), 7.44 (1H, s), 7.31-7.23 (3H, m), 7.15 (2H, d, *J*=8.7 Hz), 6.89-



6.84 (4H, m) 6.75 (2H, t,  $J=7.8$  Hz), 6.16 (1H, s), 3.73 (3H, s), 3.70 (3H, s);  $^{13}\text{C}$  NMR (75 MHz, DMSO- $d_6$ )  $\delta$  162.3, 159.1, 157.2, 146.6, 133.5, 132.7, 127.9, 127.8, 127.4, 117.3, 115.2, 114.6, 113.7, 113.6, 72.8, 55.1, 55.0; IR (KBr) 3426, 2936, 2837, 1636, 1510, 1394, 1441, 1243, 1174, 1025, 996, 830, 762  $\text{cm}^{-1}$ ; HRMS  $m/z$  ( $\text{M}^+$ ) calcd for  $\text{C}_{22}\text{H}_{20}\text{N}_2\text{O}_3$ : 360.1474. Found: 360.1477.

**3'-Phenyl-1'H-spiro[indoline-3,2'-quinazoline]-2,4'(3'H)-dione (6a)**. Yield: 98%; yellow solid; mp 264-266 °C;  $^1\text{H}$  NMR (300 MHz, DMSO- $d_6$ )  $\delta$  10.39 (1H, s), 7.68 (1H, d,  $J=7.5$  Hz), 7.60 (1H, s), 7.53 (1H, d,  $J=7.5$  Hz), 7.30 (1H, t,  $J=7.8$  Hz) 7.24-7.12 (4H, m), 7.01-6.98 (2H, m), 6.92 (1H, t,  $J=7.5$  Hz), 6.78-6.70 (2H, m), 6.64 (1H, d,  $J=7.5$  Hz);  $^{13}\text{C}$  NMR (75 MHz, DMSO- $d_6$ )  $\delta$  175.6, 163.8, 146.3, 141.4, 138.3, 134.2, 134.0, 129.9, 129.7, 129.2, 128.3, 127.9, 118.4, 115.0, 114.6, 114.1, 112.6, 76.8; IR (KBr) 3447, 3303, 1721, 1644, 1615, 1486, 1358, 1194, 1105, 1012, 964, 865, 752  $\text{cm}^{-1}$ ; HRMS  $m/z$  ( $\text{M}^+$ ) calcd for  $\text{C}_{21}\text{H}_{15}\text{N}_3\text{O}_2$ : 341.1164. Found: 341.1161.

**3'-*m*-Tolyl-1'H-spiro[indoline-3,2'-quinazoline]-2,4'(3'H)-dione (6b)**. Yield: 95%; yellow solid; mp 274-276 °C;  $^1\text{H}$  NMR (300 MHz, DMSO- $d_6$ )  $\delta$  10.40 (1H, s), 7.66 (1H, d,  $J=7.8$  Hz), 7.59 (1H, s), 7.53 (1H, d,  $J=7.2$  Hz), 7.30 (1H, t,  $J=7.8$  Hz), 7.15 (1H, t,  $J=7.5$  Hz), 7.07 (1H, t,  $J=7.2$  Hz), 6.98-6.90 (3H, m), 6.82 (1H, s), 6.75 (1H, t,  $J=8.4$  Hz), 6.70 (1H, d,  $J=8.1$  Hz), 6.64 (1H, d,  $J=7.5$  Hz), 2.15 (3H, s);  $^{13}\text{C}$  NMR (75 MHz, DMSO- $d_6$ )  $\delta$  174.3, 163.9, 146.5, 143.6, 138.3, 134.1, 131.4, 128.8, 128.7, 127.9, 127.1, 126.6, 123.1, 118.2, 115.1, 114.6, 109.3, 76.6, 21.2; IR (KBr) 3298, 3206, 3093, 1724, 1643, 1616, 1485, 1361, 1236, 1193, 1100, 1048, 963, 751  $\text{cm}^{-1}$ ; HRMS  $m/z$  ( $\text{M}^+$ ) calcd for  $\text{C}_{22}\text{H}_{17}\text{N}_3\text{O}_2$ : 355.1321. Found: 355.1318.

**3'-(4-Isopropylphenyl)-1'H-spiro[indoline-3,2'-quinazoline]-2,4'(3'H)-dione (6c)**. Yield: 98%; yellow solid; mp 276-278 °C;  $^1\text{H}$  NMR (300 MHz, DMSO- $d_6$ )  $\delta$  10.36 (1H, s), 7.66 (1H, d,  $J=7.5$  Hz), 7.56 (1H, s), 7.52 (1H, d,  $J=7.5$  Hz), 7.29 (1H, t,  $J=8.1$  Hz), 7.15 (1H, t,  $J=7.5$  Hz), 7.08-6.87 (5H, m), 6.77-6.63 (3H, m), 2.79-2.73 (1H, m), 1.09 (6H, d,  $J=6.9$  Hz);  $^{13}\text{C}$  NMR (75 MHz, DMSO- $d_6$ )  $\delta$  175.3, 163.6, 147.4, 146.0, 141.5, 135.6, 133.5, 130.6, 129.0, 127.5, 127.4, 126.3, 126.2, 122.1, 117.6, 114.5, 114.0, 110.0, 76.3, 32.7, 23.6, 23.5; IR (KBr) 3311, 3066, 2961, 1725, 1632, 1511, 1484, 1359, 1214, 1190, 1105, 1051, 955, 817, 752  $\text{cm}^{-1}$ ; HRMS  $m/z$  ( $\text{M}^+$ ) calcd for  $\text{C}_{24}\text{H}_{21}\text{N}_3\text{O}_2$ : 383.1634. Found: 383.1630.

**3'-(4-Fluorophenyl)-1'H-spiro[indoline-3,2'-quinazoline]-2,4'(3'H)-dione (6d)**. Yield: 93%; yellow solid; mp 295-296 °C;  $^1\text{H}$  NMR (300 MHz, DMSO- $d_6$ )  $\delta$  10.47 (1H, s), 7.67 (2H, t,  $J=3.3$  Hz), 7.59 (1H, d,  $J=10.5$  Hz), 7.31 (1H, t,  $J=7.2$  Hz), 7.18 (1H, t,  $J=7.5$  Hz), 7.09-6.92 (5H, m), 6.78-6.65 (3H, m);  $^{13}\text{C}$  NMR (75 MHz, DMSO- $d_6$ )  $\delta$  175.4, 163.9, 146.3, 141.4, 134.4, 134.3, 134.1, 129.8, 129.7, 127.9, 118.4, 116.2, 115.9, 114.8, 114.6, 114.2, 112.6, 76.9; IR (KBr) 3272, 3066, 1726, 1642, 1616, 1509, 1483, 1360, 1328, 1221, 1197, 1154, 1099, 961, 827, 750  $\text{cm}^{-1}$ ; HRMS  $m/z$  ( $\text{M}^+$ ) calcd for  $\text{C}_{21}\text{H}_{14}\text{FN}_3\text{O}_2$ : 359.1070. Found: 359.1068.

**3'-Benzyl-1'H-spiro[indoline-3,2'-quinazoline]-2,4'(3'H)-dione (6e)**. Yield: 96%; yellow solid; mp 210-211 °C;  $^1\text{H}$  NMR (300 MHz, DMSO- $d_6$ )  $\delta$  10.34 (1H, s), 7.72 (1H, d,  $J=7.8$  Hz), 7.45 (1H, s), 7.36-7.24 (3H, m), 7.17-7.15 (3H, m), 6.93-6.88 (3H, m), 6.83 (1H, d,  $J=7.8$  Hz), 6.76 (1H, t,  $J=7.5$  Hz), 6.67 (1H, d,  $J=7.5$  Hz), 4.48 (1H, d,  $J=15.3$  Hz), 4.15 (1H, d,  $J=15.3$  Hz);  $^{13}\text{C}$  NMR (75 MHz, DMSO- $d_6$ )  $\delta$  175.4, 164.5, 146.4, 142.9, 137.8, 133.8, 131.7, 128.2, 127.8, 127.2, 126.8, 126.7, 122.4, 118.1, 115.1, 114.4, 110.9, 75.5, 46.3; IR (KBr) 3297, 3090, 2944, 1727, 1625, 1483, 1383, 1323, 1242, 1191, 968. 750  $\text{cm}^{-1}$ ; HRMS  $m/z$  ( $\text{M}^+$ ) calcd for  $\text{C}_{22}\text{H}_{17}\text{N}_3\text{O}_2$ : 355.1321. Found: 355.1318.

**6-Amino-1,3-dimethyl-5-(2-phenyl-4H-chromen-4-yl)pyrimidine-2,4(1H,3H)-dione (9a)**. Yield: 87%; red solid; mp 146-148 °C;  $^1\text{H}$  NMR (300 MHz,  $\text{CDCl}_3$ )  $\delta$  7.65 (2H, d,  $J=6.3$  Hz), 7.38-7.31 (3H, m), 7.15 (1H, t,  $J=7.8$  Hz), 7.07-6.94 (3H, m), 5.55 (1H, d,  $J=3.0$  Hz), 5.39 (1H, d,  $J=3.9$  Hz), 4.86 (2H, s), 3.30 (3H, s), 3.28 (3H, s);  $^{13}\text{C}$  NMR (75 MHz,  $\text{CDCl}_3$ )  $\delta$  162.8, 151.4, 151.0, 149.2, 133.2, 128.8, 128.7, 128.3, 128.1, 124.3, 124.2, 121.2, 116.3, 98.9, 92.4, 29.1, 28.8, 28.4; IR (KBr) 3340, 3215, 1735, 1692, 1581, 1488, 1315, 1187, 1110, 1041, 916, 756, 502  $\text{cm}^{-1}$ ; HRMS  $m/z$  ( $\text{M}^+$ ) calcd for  $\text{C}_{21}\text{H}_{19}\text{N}_3\text{O}_3$ : 361.1426. Found: 361.1430.

**6-Amino-1,3-dimethyl-5-(6-methyl-2-phenyl-4H-chromen-4-yl)pyrimidine-2,4(1H,3H)-dione (9b)**. Yield: 85%; red solid; mp 151-153 °C;  $^1\text{H}$  NMR (300 MHz,  $\text{CDCl}_3$ )  $\delta$  7.64 (2H, d,  $J=7.8$  Hz), 7.36-7.28 (3H, m), 6.96-6.86 (3H, m), 5.53 (1H, d,  $J=3.6$  Hz), 5.37 (1H, d,  $J=4.2$  Hz), 4.80 (2H, s), 3.33 (3H, s), 3.29 (3H, s), 2.20 (3H, s);  $^{13}\text{C}$  NMR (75 MHz,  $\text{CDCl}_3$ )  $\delta$  162.8, 151.4, 151.1, 149.3, 149.0, 133.7, 133.4, 128.9, 128.8, 128.7, 128.3, 124.4, 120.8, 116.0,

98.7, 92.6, 29.2, 28.7, 28.4, 20.6; IR (KBr) 3337, 3213, 1735, 1693, 1583, 1492, 1374, 1125, 1043, 1012, 942, 760, 506  $\text{cm}^{-1}$ ; HRMS  $m/z$  ( $M^+$ ) calcd for  $\text{C}_{22}\text{H}_{21}\text{N}_3\text{O}_3$ : 375.1583. Found: 375.1579.

**6-Amino-1,3-dimethyl-5-(8-methyl-2-phenyl-4H-chromen-4-yl)pyrimidine-2,4(1H,3H)-dione (9c).** Yield: 85%; red solid; mp 150-152  $^{\circ}\text{C}$ ;  $^1\text{H}$  NMR (300 MHz,  $\text{CDCl}_3$ )  $\delta$  7.68 (2H, d,  $J=7.8$  Hz), 7.40-7.33 (3H, m), 7.03 (1H, d,  $J=6.9$  Hz), 6.95-6.86 (2H, m), 5.62 (1H, d,  $J=3.6$  Hz), 5.45 (1H, d,  $J=3.9$  Hz), 4.63 (2H, s), 3.37 (3H, s), 3.30 (3H, s), 2.39 (3H, s);  $^{13}\text{C}$  NMR (75MHz,  $\text{CDCl}_3$ )  $\delta$  162.8, 151.2, 151.1, 149.4, 149.2, 133.6, 129.5, 128.7, 128.5, 126.4, 125.6, 124.4, 123.7, 120.9, 99.0, 93.0, 29.5, 28.7, 28.5, 16.0; IR (KBr) 3337, 3220, 1691, 1585, 1497, 1445, 1375, 1262, 1174, 1099, 1088, 763, 699, 507  $\text{cm}^{-1}$ ; HRMS  $m/z$  ( $M^+$ ) calcd for  $\text{C}_{22}\text{H}_{21}\text{N}_3\text{O}_3$ : 375.1583. Found: 375.1582.

**6-Amino-1,3-dimethyl-5-(3-methyl-2-phenyl-4H-chromen-4-yl)pyrimidine-2,4(1H,3H)-dione (9d).** Yield: 84%; red solid; mp 153-155  $^{\circ}\text{C}$ ;  $^1\text{H}$  NMR (300 MHz,  $\text{CDCl}_3$ )  $\delta$  7.44 (2H, d,  $J=6.3$  Hz), 7.40-7.35 (3H, m), 7.10 (2H, d,  $J=6.9$  Hz), 6.96 (1H, t,  $J=7.2$  Hz), 6.89 (1H, d,  $J=8.4$  Hz), 5.45 (1H, s), 4.89 (2H, s), 3.35 (3H, s), 3.34 (3H, s), 1.69 (3H, s);  $^{13}\text{C}$  NMR (75 MHz,  $\text{CDCl}_3$ )  $\delta$  163.2, 151.2, 151.1, 151.0, 145.3, 134.4, 128.8, 128.7, 128.5, 128.1, 127.8, 123.8, 121.7, 115.6, 107.3, 91.9, 34.7, 28.8, 28.5, 16.8; IR (KBr) 3334, 3207, 1689, 1584, 1489, 1239, 1193, 1094, 1062, 910, 702, 506  $\text{cm}^{-1}$ ; HRMS  $m/z$  ( $M^+$ ) calcd for  $\text{C}_{22}\text{H}_{21}\text{N}_3\text{O}_3$ : 375.1583. Found: 375.1585.

**6-Amino-5-(6-bromo-2-phenyl-4H-chromen-4-yl)-1,3-dimethylpyrimidine-2,4(1H,3H)-dione (9e).** Yield: 81%; red solid; mp 159-161  $^{\circ}\text{C}$ ;  $^1\text{H}$  NMR (600 MHz,  $\text{CDCl}_3$ )  $\delta$  7.59 (2H, d,  $J=7.2$  Hz), 7.33-7.28 (3H, m), 7.22 (1H, dd,  $J=9.0, 1.8$  Hz), 7.16 (1H, s), 6.87 (1H, d,  $J=9.0$  Hz), 5.55 (1H, s), 5.37 (1H, d,  $J=4.2$  Hz), 4.58 (2H, s), 3.34 (3H, s), 3.28 (3H, s);  $^{13}\text{C}$  NMR (150 MHz,  $\text{CDCl}_3$ )  $\delta$  162.7, 151.3, 151.0, 150.3, 149.4, 132.9, 131.4, 131.2, 129.0, 128.5, 124.4, 123.7, 118.1, 116.5, 98.7, 92.4, 29.2, 28.7, 28.5; IR (KBr) 3336, 3208, 1690, 1586, 1490, 1241, 1195, 1097, 1082, 915, 701, 505  $\text{cm}^{-1}$ ; HRMS  $m/z$  ( $M^+$ ) calcd for  $\text{C}_{21}\text{H}_{18}\text{BrN}_3\text{O}_3$ : 439.0532. Found: 439.0529.

1. M. Narasimhulu and Y.R. Lee, *Tetrahedron*, 2011, **67**, 9627-9634.

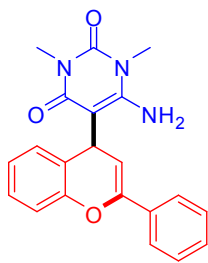

<sup>1</sup>H NMR of **9a**  
(300 MHz, CDCl<sub>3</sub>)

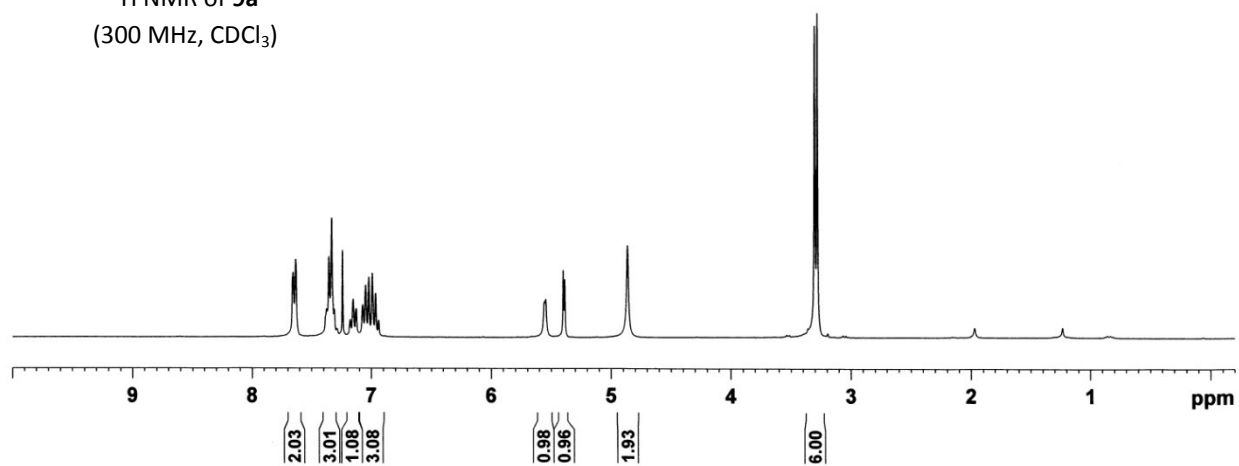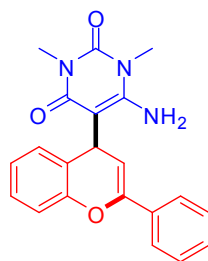

<sup>13</sup>C NMR of **9a**  
(75 MHz, CDCl<sub>3</sub>)

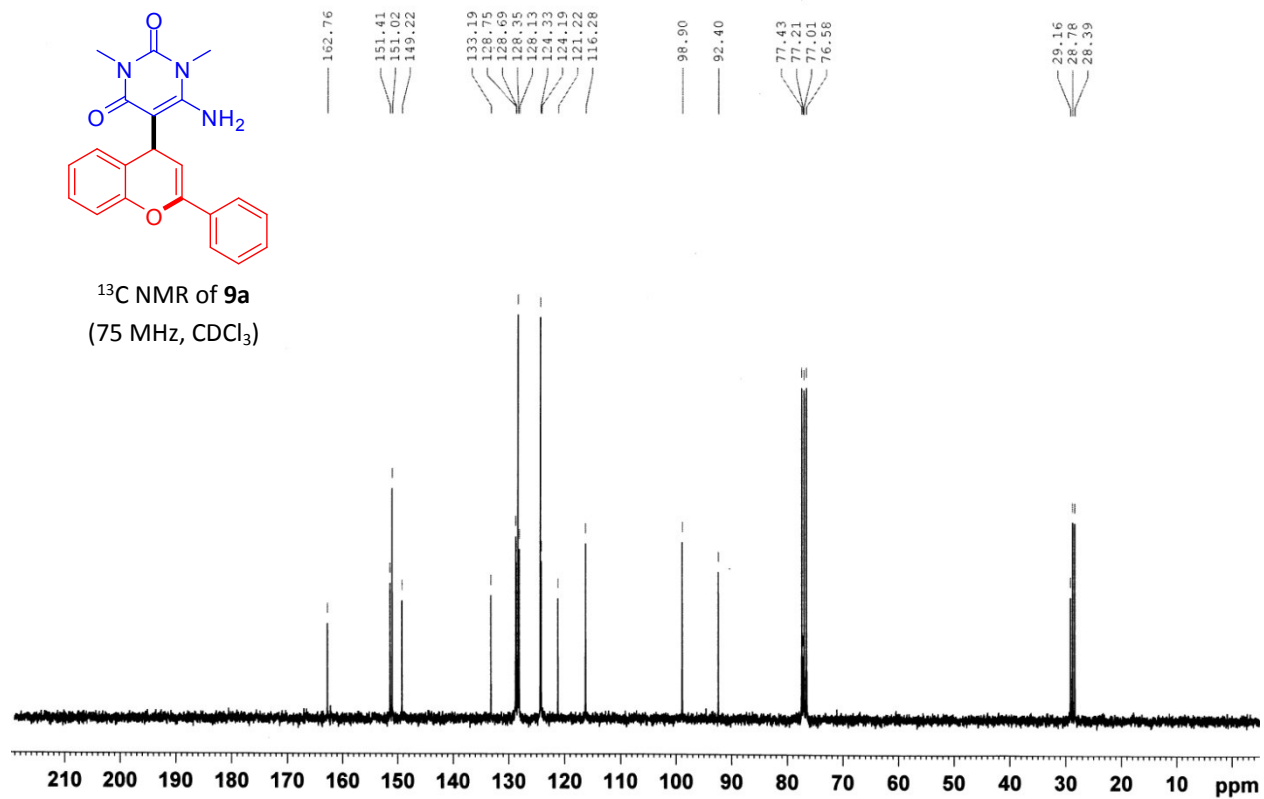

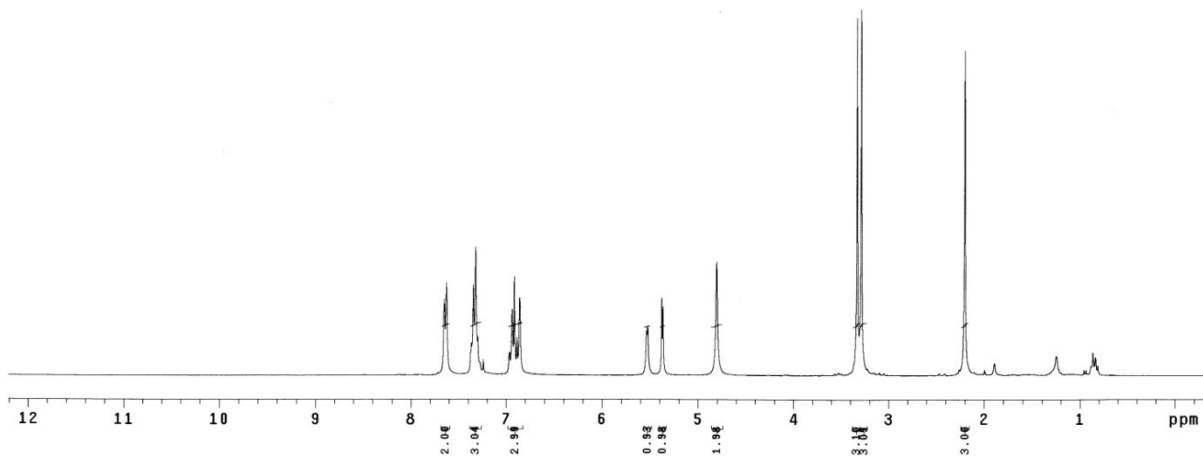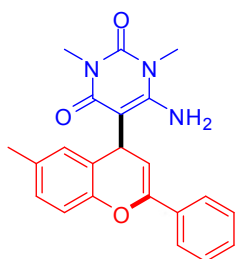

**<sup>1</sup>H NMR of 9b**  
(300 MHz, CDCl<sub>3</sub>)

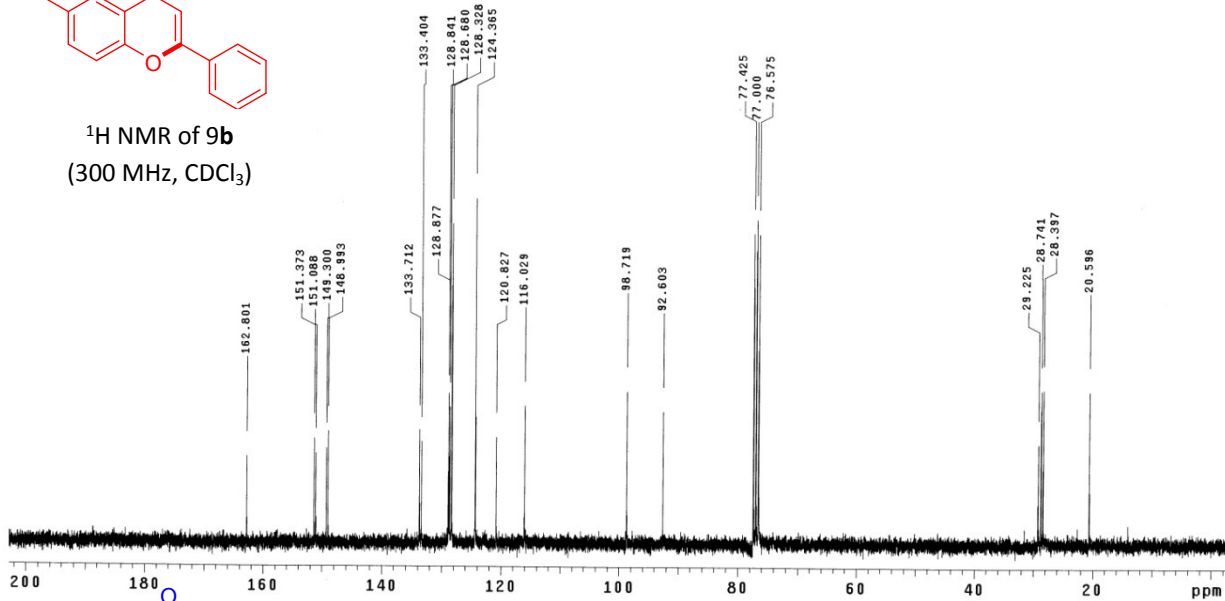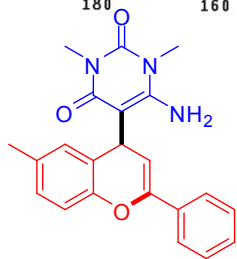

**<sup>13</sup>C NMR of 9b**  
(75 MHz, CDCl<sub>3</sub>)

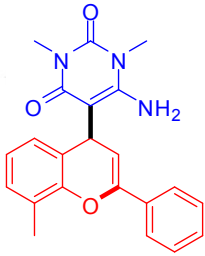

<sup>1</sup>H NMR of **9c**  
(300 MHz, CDCl<sub>3</sub>)

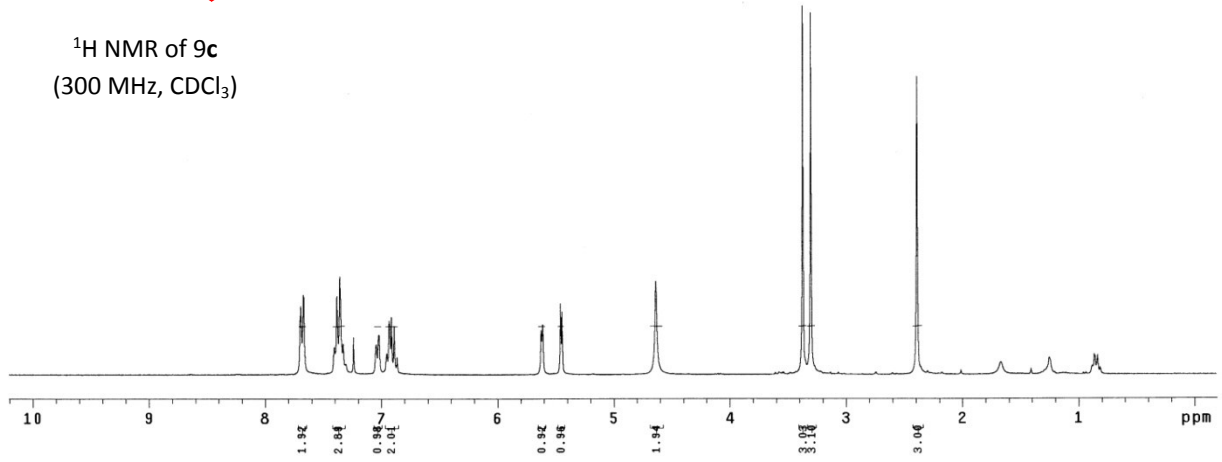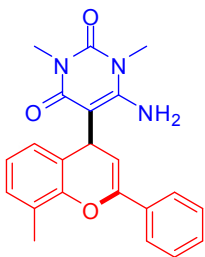

<sup>13</sup>C NMR of **9c**  
(75 MHz, CDCl<sub>3</sub>)

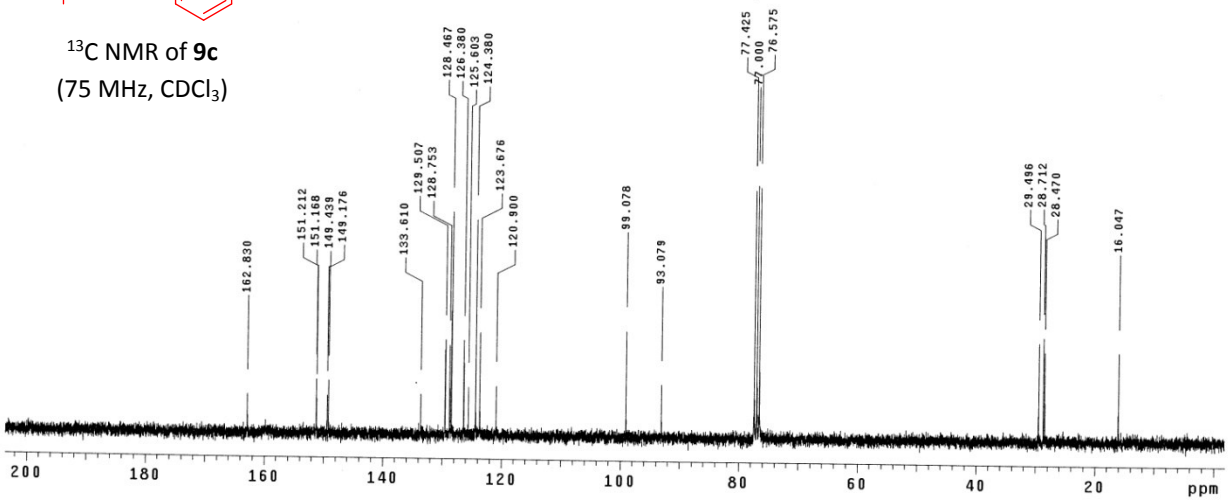

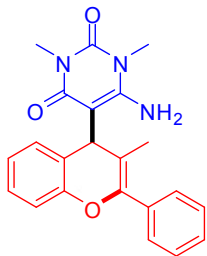

<sup>1</sup>H NMR of 9d  
(300 MHz, CDCl<sub>3</sub>)

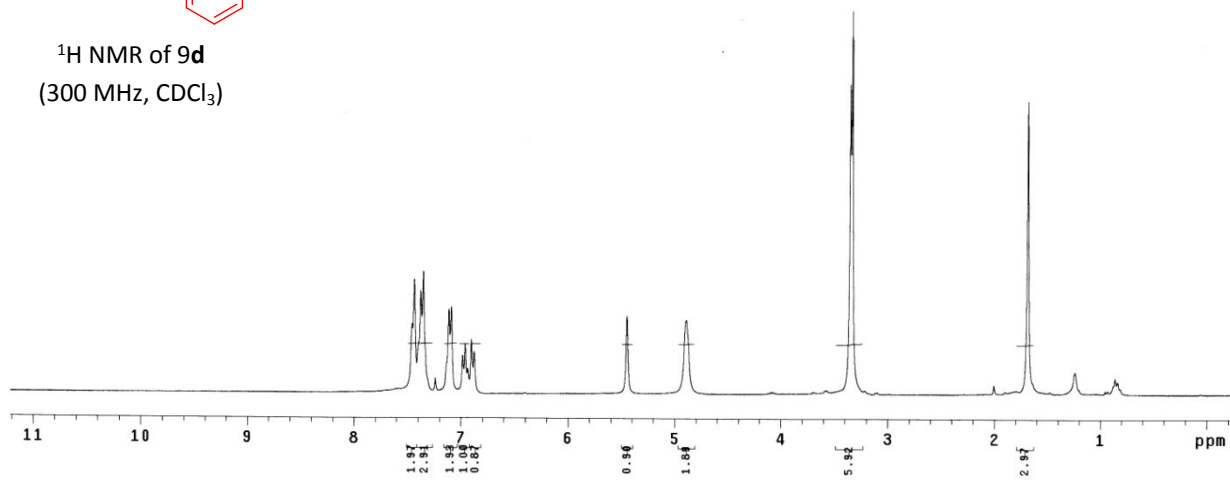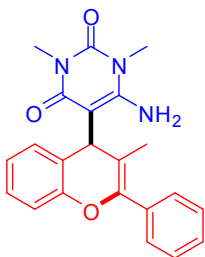

<sup>13</sup>C NMR of 9d  
(75 MHz, CDCl<sub>3</sub>)

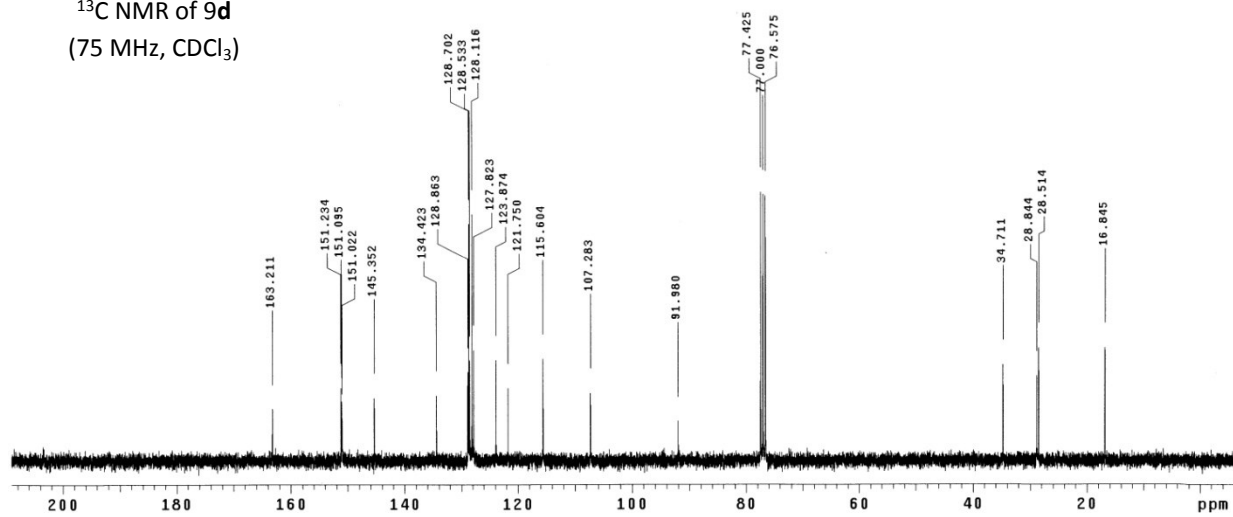



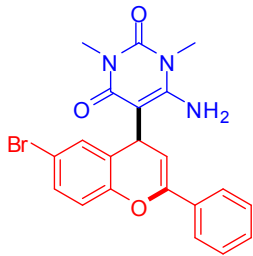

<sup>1</sup>H NMR of **9e**  
(600 MHz, CDCl<sub>3</sub>)

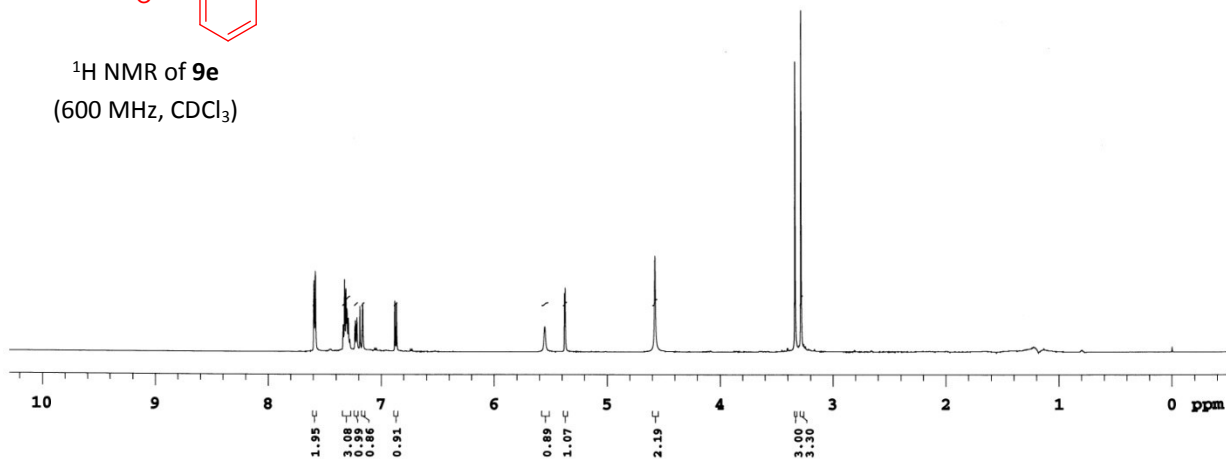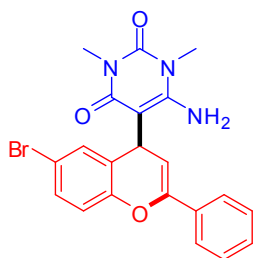

<sup>13</sup>C NMR of **9e**  
(150 MHz, CDCl<sub>3</sub>)

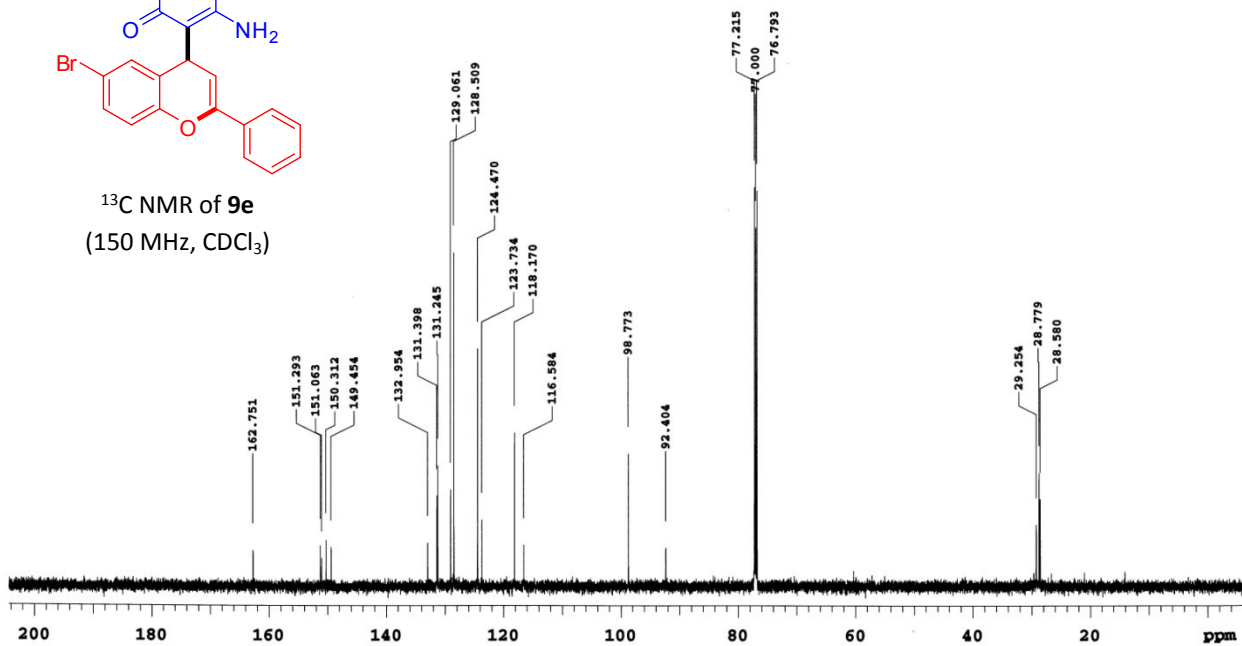

Supplement: c6ra03883b1.pdf [file c6ra03883b1.pdf]
